# Supplementary material
Source: publisher figshare collection journal article supplement (https://acs.figshare.com/ndownloader/files/3836947)
Supplement: Supplementary file 1 [file 3836947]

data_acs15dia1
_publ_section_title
;
Crystal and molecular structure of
acs15dia1                                                               
;
_publ_section_abstract
;
We present the crystal and molecular structure of
acs15dia1                                                               .
;
_publ_section_comment
;
The study of the titled structure was undertaken to establish its three
dimensional structure.  Geometries are tabulated below.  All Diagrams and
calculations were performed using maXus (MacScience, Japan).
;
_chemical_compound_source        'Local laboratory'
_exptl_crystal_description       'prism'
_exptl_crystal_colour            'Colourless'
_exptl_crystal_size_max           0.5
_exptl_crystal_size_mid           0.5
_exptl_crystal_size_min           0.4
_chemical_formula_sum            'C21 H36 P1 O5 N1'
_chemical_formula_weight          413.49
_cell_length_a                    9.0756(3)
_cell_length_b                    16.0249(8)
_cell_length_c                    16.9442(8)
_cell_angle_alpha                 90.00(1)
_cell_angle_beta                  100.193(2)
_cell_angle_gamma                 90.00(1)
_cell_volume                      2425.4(3)
_cell_measurement_reflns_used     '16552'
_cell_measurement_theta_min       '1'
_cell_measurement_theta_max       '25'
_cell_formula_units_Z             5
_exptl_crystal_density_diffrn     1.42
_exptl_crystal_density_meas       1.25
_exptl_absorpt_coefficient_mu     1.41
_cell_measurement_temperature     '298'
_exptl_absorpt_correction_type   'none'
_diffrn_reflns_number             4804
_reflns_number_total              4614
_reflns_number_observed           3678
_reflns_observed_criterion       'refl_observed_if_I_>_3.00_sigma(I)'
_diffrn_reflns_theta_max          25.41
_refine_ls_structure_factor_coef  F
_refine_ls_R_factor_obs           0.062
_refine_ls_wR_factor_obs          0.095
_refine_ls_hydrogen_treatment    'noref'
_refine_ls_number_reflns          3678
_refine_ls_number_parameters      253
_refine_ls_goodness_of_fit_obs    1.996
_refine_ls_weighting_scheme      'Count statistics'
_refine_ls_shift/esd_max          0.0276
_refine_ls_shift/esd_mean          0.0042
_refine_diff_density_min          -0.26
_refine_diff_density_max          0.46
_refine_ls_extinction_method     'None'
_atom_type_scat_source 'D.Waasmaier&A.Kirfel,Acta Cryst.1995,A51, 416-431'
_computing_data_reduction        'maXus'
_computing_molecular_graphics    'maXus'
_computing_publication_material  'maXus'
_computing_structure_refinement  'maXus'
_computing_structure_solution    'maXus'

_diffrn_measurement_device  'KappaCCD'
_computing_data_collection  'KappaCCD'
_diffrn_radiation_type 'xray'
_diffrn_reflns_limit_h_min      0
_diffrn_reflns_limit_h_max     10
_diffrn_reflns_limit_k_min      0
_diffrn_reflns_limit_k_max     19
_diffrn_reflns_limit_l_min    -21
_diffrn_reflns_limit_l_max     20
_diffrn_radiation_wavelength      0.71073

_diffrn_orient_matrix_type 'X=UH'
_diffrn_orient_matrix_UB_11    0.01000
_diffrn_orient_matrix_UB_12    0.00000
_diffrn_orient_matrix_UB_13    0.00000
_diffrn_orient_matrix_UB_21    0.00000
_diffrn_orient_matrix_UB_22    0.01000
_diffrn_orient_matrix_UB_23    0.00000
_diffrn_orient_matrix_UB_31    0.00000
_diffrn_orient_matrix_UB_32    0.00000
_diffrn_orient_matrix_UB_33    0.01000


loop_
_symmetry_equiv_pos_as_xyz
 +X,+Y,+Z                                                                        
 -X,-Y,-Z                                                                        
 -X+0.5,+Y+0.5,-Z+0.5                                                            
 +X+0.5,-Y+0.5,+Z+0.5                                                            

_symmetry_space_group_name_H-M 'P 21/n        '
_symmetry_cell_setting 'Monoclinic'
#==================================================

# ATOMIC COORDINATES AND THERMAL PARAMETERS 

loop_
_atom_site_label
_atom_site_fract_x
_atom_site_fract_y
_atom_site_fract_z
_atom_site_U_iso_or_equiv
_atom_site_occupancy
_atom_site_thermal_displace_type
 P1       0.98620(3)   0.16370(2)   0.31940(1)    0.0510(1)       1.00 Uij
 O2       0.83870(6)   0.30080(4)   0.25110(3)    0.0481(3)       1.00 Uij
 N3       0.89990(7)   0.26500(5)   0.18460(4)    0.0457(4)       1.00 Uij
 O4       0.82050(7)   0.14470(4)   0.32720(4)    0.0586(4)       1.00 Uij
 O5       1.06440(8)   0.21530(5)   0.38480(4)    0.0680(4)       1.00 Uij
 O6       1.04930(8)   0.07200(5)   0.31670(5)    0.0718(4)       1.00 Uij
 C7       1.0026(1)    0.19550(6)   0.21680(5)    0.0481(5)       1.00 Uij
 C8       0.9135(1)    0.37720(6)   0.28240(6)    0.0586(5)       1.00 Uij
 C9       0.7641(1)    0.23840(7)   0.12390(5)    0.0557(5)       1.00 Uij
 C10      0.8175(1)    0.20340(8)   0.04980(6)    0.0735(6)       1.00 Uij
 C11      0.8270(1)    0.40380(6)   0.34680(6)    0.0575(5)       1.00 Uij
 C12      1.1699(1)    0.21340(7)   0.20540(6)    0.0640(6)       1.00 Uij
 C13      0.8975(1)    0.40970(8)   0.42540(7)    0.0724(7)       1.00 Uij
 C14      0.6764(1)    0.31820(9)   0.09840(7)    0.0861(8)       1.00 Uij
 C15      1.2485(1)    0.2826(1)    0.25900(9)    0.1006(9)       1.00 Uij
 O16      0.5456(1)    0.30740(9)   0.04420(6)    0.1249(7)       1.00 Uij
 C17      0.6763(1)    0.42240(9)   0.32860(7)    0.0831(8)       1.00 Uij
 C18      0.7366(2)    0.19230(9)   0.37780(9)    0.0911(8)       1.00 Uij
 C19      1.1716(1)    0.2400(1)    0.11880(8)    0.0851(8)       1.00 Uij
 C20      0.6645(1)    0.1746(1)    0.15510(7)    0.0872(8)       1.00 Uij
 C21      0.5973(2)    0.4446(1)    0.3890(1)     0.103(1)        1.00 Uij
 C22      0.8187(2)    0.43330(9)   0.48490(8)    0.0911(9)       1.00 Uij
 C23      0.9166(2)    0.44350(8)   0.21940(8)    0.0896(8)       1.00 Uij
 C24      1.0694(2)    0.02020(9)   0.38800(9)    0.103(1)        1.00 Uij
 C25      1.2634(1)    0.1333(1)    0.2197(1)     0.1045(9)       1.00 Uij
 C26      0.6226(2)    0.1440(1)    0.4032(1)     0.125(1)        1.00 Uij
 C27      0.6712(2)    0.44950(9)   0.46690(9)    0.098(1)        1.00 Uij
 C28      1.1979(4)   -0.0219(3)    0.3978(2)     0.336(5)        1.00 Uij
 H7       0.97190      0.15030      0.18040       0.08730         1.00 Uiso
 H8       1.01620      0.36510      0.30430       0.09810         1.00 Uiso
 H10A     0.87970      0.24350      0.02940       0.11230         1.00 Uiso
 H10B     0.73230      0.19090      0.00930       0.11230         1.00 Uiso
 H10C     0.87370      0.15330      0.06440       0.11230         1.00 Uiso
 H13      1.00300      0.39880      0.43890       0.11120         1.00 Uiso
 H14A     0.65070      0.34530      0.14470       0.12380         1.00 Uiso
 H14B     0.73730      0.35480      0.07290       0.12380         1.00 Uiso
 H15A     1.19070      0.33300      0.25000       0.14010         1.00 Uiso
 H15B     1.34660      0.29220      0.24700       0.14010         1.00 Uiso
 H15C     1.25680      0.26610      0.31410       0.14010         1.00 Uiso
 H17      0.62540      0.41950      0.27390       0.12200         1.00 Uiso
 H18A     0.80470      0.21240      0.42370       0.13240         1.00 Uiso
 H18B     0.68930      0.23880      0.34770       0.13240         1.00 Uiso
 H19A     1.11530      0.29070      0.10780       0.12550         1.00 Uiso
 H19B     1.12710      0.19700      0.08280       0.12550         1.00 Uiso
 H19C     1.27280      0.24920      0.11150       0.12550         1.00 Uiso
 H20A     0.72210      0.12520      0.17080       0.12550         1.00 Uiso
 H20B     0.58140      0.16100      0.11370       0.12550         1.00 Uiso
 H20C     0.62800      0.19690      0.20060       0.12550         1.00 Uiso
 H21      0.49220      0.45660      0.37620       0.14240         1.00 Uiso
 H22      0.86930      0.43790      0.53950       0.13040         1.00 Uiso
 H23A     0.97220      0.42460      0.17960       0.12950         1.00 Uiso
 H23B     0.96260      0.49290      0.24470       0.12950         1.00 Uiso
 H23C     0.81560      0.45590      0.19430       0.12950         1.00 Uiso
 H24A     1.07450      0.05600      0.43380       0.14170         1.00 Uiso
 H24B     0.98640     -0.01740      0.38570       0.14170         1.00 Uiso
 H25A     1.26560      0.11430      0.27360       0.14460         1.00 Uiso
 H25B     1.36370      0.14360      0.21140       0.14460         1.00 Uiso
 H25C     1.21800      0.09140      0.18270       0.14460         1.00 Uiso
 H26A     0.56810      0.17590      0.43640       0.16720         1.00 Uiso
 H26B     0.67020      0.09750      0.43320       0.16720         1.00 Uiso
 H26C     0.55480      0.12390      0.35710       0.16720         1.00 Uiso
 H27      0.61600      0.46420      0.50830       0.13840         1.00 Uiso
 H28A     1.21320     -0.05550      0.44540       0.38020         1.00 Uiso
 H28B     1.28010      0.01620      0.39970       0.38020         1.00 Uiso
 H28C     1.19200     -0.05720      0.35160       0.38020         1.00 Uiso
 H16      0.57420      0.30940     -0.01860       0.16250         1.00 Uiso


loop_
_atom_site_aniso_label
_atom_site_aniso_U_11
_atom_site_aniso_U_22
_atom_site_aniso_U_33
_atom_site_aniso_U_12
_atom_site_aniso_U_13
_atom_site_aniso_U_23
 P1      0.0518(2)  0.0597(2)  0.0386(1)  -.0001(1)  0.00020(9) 0.0030(1)       
 O2      0.0527(4)  0.0543(4)  0.0361(3)  0.0020(3)  0.0096(3)  -.0032(3)       
 N3      0.0435(4)  0.0609(5)  0.0312(4)  0.0053(3)  0.0051(3)  -.0017(3)       
 O4      0.0592(4)  0.0639(4)  0.0520(4)  -.0063(3)  0.0152(3)  -.0019(3)       
 O5      0.0761(5)  0.0833(5)  0.0398(4)  -.0157(4)  -.0060(3)  -.0005(3)       
 O6      0.0792(5)  0.0666(5)  0.0666(5)  0.0152(4)  0.0097(4)  0.0139(4)       
 C7      0.0431(5)  0.0607(6)  0.0382(5)  0.0043(4)  0.0024(3)  -.0005(4)       
 C8      0.0634(6)  0.0534(6)  0.0574(6)  -.0067(5)  0.0126(5)  -.0065(5)       
 C9      0.0493(5)  0.0807(7)  0.0342(5)  0.0077(5)  -.0013(4)  -.0052(5)       
 C10     0.0711(7)  0.1026(9)  0.0429(6)  0.0122(6)  -.0009(5)  -.0184(6)       
 C11     0.0693(7)  0.0478(6)  0.0532(6)  0.0032(5)  0.0092(5)  -.0057(5)       
 C12     0.0431(5)  0.0890(8)  0.0588(6)  0.0056(5)  0.0113(4)  0.0060(6)       
 C13     0.0817(8)  0.0732(8)  0.0587(7)  0.0073(6)  0.0059(6)  -.0056(6)       
 C14     0.0861(8)  0.118(1)   0.0469(6)  0.0490(7)  -.0161(5)  -.0079(6)       
 C15     0.0590(8)  0.149(1)   0.092(1)   -.0325(8)  0.0198(6)  -.0201(9)       
 O16     0.0979(7)  0.209(1)   0.0606(6)  0.0584(7)  -.0113(5)  -.0085(6)       
 C17     0.0821(9)  0.100(1)   0.0641(7)  0.0266(7)  0.0068(6)  -.0139(7)       
 C18     0.0886(9)  0.0926(9)  0.096(1)   -.0118(7)  0.0534(7)  -.0214(8)       
 C19     0.0684(8)  0.115(1)   0.0733(8)  0.0020(7)  0.0311(6)  0.0125(7)       
 C20     0.0543(7)  0.146(1)   0.0561(7)  -.0293(7)  -.0092(5)  -.0040(7)       
 C21     0.089(1)   0.120(1)   0.098(1)   0.0407(8)  0.0233(8)  -.0126(9)       
 C22     0.115(1)   0.099(1)   0.0573(7)  0.0207(8)  0.0168(7)  -.0104(7)       
 C23     0.115(1)   0.0692(8)  0.0842(9)  -.0160(7)  0.0337(8)  0.0047(7)       
 C24     0.127(1)   0.081(1)   0.097(1)   0.0135(8)  0.0142(9)  0.0370(8)       
 C25     0.0589(8)  0.128(1)   0.126(1)   0.0311(8)  0.0336(7)  0.027(1)        
 C26     0.121(1)   0.141(1)   0.120(1)   -.021(1)   0.073(1)   -.021(1)        
 C27     0.125(1)   0.098(1)   0.0722(9)  0.0339(9)  0.0347(8)  -.0061(8)       
 C28     0.309(4)   0.401(5)   0.308(4)   0.273(4)   0.169(3)   0.265(4)        

loop_
   _geom_bond_atom_site_label_1 
   _geom_bond_atom_site_label_2
   _geom_bond_distance  
   _geom_bond_site_symmetry_1
   _geom_bond_site_symmetry_2
   _geom_bond_publ_flag 
 P1    O4       1.563(1) . . ?
 P1    O5       1.462(1) . . ?
 P1    O6       1.581(1) . . ?
 P1    C7       1.843(1) . . ?
 O2    N3       1.459(1) . . ?
 O2    C8       1.454(2) . . ?
 N3    C7       1.492(2) . . ?
 N3    C9       1.520(2) . . ?
 O4    C18      1.459(2) . . ?
 O6    C24      1.450(2) . . ?
 C7    C12      1.590(2) . . ?
 C8    C11      1.514(2) . . ?
 C8    C23      1.510(2) . . ?
 C9    C10      1.530(2) . . ?
 C9    C14      1.528(2) . . ?
 C9    C20      1.520(2) . . ?
 C11   C13      1.375(2) . . ?
 C11   C17      1.380(2) . . ?
 C12   C15      1.528(2) . . ?
 C12   C19      1.531(2) . . ?
 C12   C25      1.534(2) . . ?
 C13   C22      1.388(2) . . ?
 C14   O16      1.377(2) . . ?
 C17   C21      1.396(3) . . ?
 C18   C26      1.419(3) . . ?
 C21   C27      1.373(3) . . ?
 C22   C27      1.345(3) . . ?
 C24   C28      1.332(5) . . ?
 O5    H16      1.671(1) .   4_656 ?
 O16   H14A     1.898(2) . . ?
 O16   H14B     1.882(2) . . ?
 O16   H16      1.139(2) . . ?
 C24   H28B     1.888(2) . . ?
 C24   H28C     1.844(2) . . ?
 C28   H24A     1.851(5) . . ?
 C28   H24B     1.895(4) . . ?


loop_
  _geom_angle_atom_site_label_1 
  _geom_angle_atom_site_label_2 
  _geom_angle_atom_site_label_3 
  _geom_angle 
  _geom_angle_site_symmetry_1
  _geom_angle_site_symmetry_2
  _geom_angle_site_symmetry_3
  _geom_angle_publ_flag 
  O4    P1    O5         113.0(1)  . . . ?
  O4    P1    O6         100.4(1)  . . . ?
  O4    P1    C7         111.9(1)  . . . ?
  O5    P1    O6         114.7(1)  . . . ?
  O5    P1    C7         116.7(1)  . . . ?
  O6    P1    C7          98.0(1)  . . . ?
  N3    O2    C8         113.3(1)  . . . ?
  O2    N3    C7         108.0(1)  . . . ?
  O2    N3    C9         105.0(1)  . . . ?
  C7    N3    C9         114.7(1)  . . . ?
  P1    O4    C18        123.9(1)  . . . ?
  P1    O6    C24        120.0(1)  . . . ?
  P1    C7    N3         113.7(1)  . . . ?
  P1    C7    C12        113.7(1)  . . . ?
  N3    C7    C12        111.7(1)  . . . ?
  O2    C8    C11        103.4(1)  . . . ?
  O2    C8    C23        113.6(1)  . . . ?
  C11   C8    C23        112.9(1)  . . . ?
  N3    C9    C10        108.7(1)  . . . ?
  N3    C9    C14        106.0(1)  . . . ?
  N3    C9    C20        114.5(1)  . . . ?
  C10   C9    C14        107.4(1)  . . . ?
  C10   C9    C20        109.5(1)  . . . ?
  C14   C9    C20        110.4(1)  . . . ?
  C8    C11   C13        120.4(1)  . . . ?
  C8    C11   C17        121.3(1)  . . . ?
  C13   C11   C17        118.3(1)  . . . ?
  C7    C12   C15        114.5(1)  . . . ?
  C7    C12   C19        109.8(1)  . . . ?
  C7    C12   C25        110.1(1)  . . . ?
  C15   C12   C19        106.6(2)  . . . ?
  C15   C12   C25        109.0(1)  . . . ?
  C19   C12   C25        106.6(2)  . . . ?
  C11   C13   C22        120.7(2)  . . . ?
  C9    C14   O16        115.3(2)  . . . ?
  C11   C17   C21        120.6(2)  . . . ?
  O4    C18   C26        112.2(2)  . . . ?
  C17   C21   C27        119.5(2)  . . . ?
  C13   C22   C27        120.5(2)  . . . ?
  O6    C24   C28        111.8(3)  . . . ?
  C21   C27   C22        120.3(2)  . . . ?
  P1    O5    H16        122.9(1)  . .    4_656 ?
  C14   O16   H14A        28.9(1)  . . . ?
  C14   O16   H14B        29.4(1)  . . . ?
  C14   O16   H16        107.9(1)  . . . ?
  H14A  O16   H14B        49.0(1)  . . . ?
  H14A  O16   H16        131.9(1)  . . . ?
  H14B  O16   H16         82.9(1)  . . . ?
  O6    C24   H28B        94.7(1)  . . . ?
  O6    C24   H28C        95.8(1)  . . . ?
  C28   C24   H28B        28.6(2)  . . . ?
  C28   C24   H28C        30.0(2)  . . . ?
  H28B  C24   H28C        49.6(1)  . . . ?
  C24   C28   H24A        29.8(2)  . . . ?
  C24   C28   H24B        28.3(2)  . . . ?
  H24A  C28   H24B        49.4(2)  . . . ?
  O5    H16   O16        157.9(1)   4_555   . . ?

#===================================================
